# Supplementary material for: Genomic Characterization of a Proteus sp. Strain of Animal Origin Co-Carrying blaNDM-1 and lnu(G)
Source: MDPI journal article supplement (doi:10.3390/antibiotics10111411), 2021-11-18
Supplement: s1 [file s1]

**Table S1. Pairwise comparison of complete sequences of pPvSC3-like plasmids using BLASTN.**

| (coverage+identity) | pNDM_NMG38-2 | pPvSC3       | pM2-1        |
|---------------------|--------------|--------------|--------------|
| pNDM_NMG38-2        | —            | (92%+99.98%) | (98%+99.99%) |
| pPvSC3              | (88%+99.98%) | —            | (96%+99.75%) |
| pM2-1               | (88%+99.99%) | (92%+99.75%) | —            |

**Table S2. Pairwise comparison of plamid backbone sequences of pPvSC3-like plasmids using BLASTN.**

| (coverage+identity) | pNDM_NMG38-2 | pPvSC3       | pM2-1        |
|---------------------|--------------|--------------|--------------|
| pNDM_NMG38-2        | —            | (97%+99.98%) | (97%+99.99%) |
| pPvSC3              | (96%+99.98%) | —            | (99%+100%)   |
| pM2-1               | (96%+99.99%) | (99%+100%)   | —            |

**Table S3. Detailed information of *lnu(G)*-carrying plasmids or chromosomes (last accessed 18 August, 2021 ) .**

| Accession no. | Plasmid/ chromosome | Host strain                  | Country        | Year | Origin | Plasmid replicon |
|---------------|---------------------|------------------------------|----------------|------|--------|------------------|
| LR962611      | chromosome          | <i>Enterococcus faecalis</i> | Netherlands    | 2020 | -      | -                |
| LR962628      | chromosome          | <i>Enterococcus faecalis</i> | Netherlands    | 2020 | -      | -                |
| LR962531      | chromosome          | <i>Enterococcus faecalis</i> | Netherlands    | 2020 | -      | -                |
| LR962454      | chromosome          | <i>Enterococcus faecalis</i> | Netherlands    | 2020 | -      | -                |
| LR962846      | chromosome          | <i>Enterococcus faecalis</i> | Netherlands    | 2020 | -      | -                |
| OD940420      | chromosome          | <i>Enterococcus faecalis</i> | United Kingdom | 2021 | Human  | -                |
| KX470419      | chromosome          | <i>Enterococcus faecalis</i> | China          | 2016 | Animal | -                |
| CP042216      | chromosome          | <i>Enterococcus faecalis</i> | Brazil         | 2013 | Animal | -                |
| CP043724      | chromosome          | <i>Enterococcus</i>          | Brazil         | 2013 | Animal | -                |

|          |            |                          |           |           |             |                                                             |
|----------|------------|--------------------------|-----------|-----------|-------------|-------------------------------------------------------------|
|          |            | <i>faecalis</i>          |           |           |             |                                                             |
| CP073085 | chromosome | <i>Enterococcus</i>      | Brazil    | 2013      | Animal      |                                                             |
|          |            | <i>faecalis</i>          |           |           |             |                                                             |
| CP023074 | chromosome | <i>Enterococcus</i>      | Canada    | 2017      | Environment | -                                                           |
|          |            | <i>thailandicus</i>      |           |           |             |                                                             |
| CP075898 | plasmid    | <i>Exiguobacterium</i>   | China     | 2021      | Fruit       | NT                                                          |
|          |            | <i>acetylicum</i>        |           |           |             |                                                             |
| CP049753 | chromosome | <i>Proteus</i>           | Brazil    | 2015      | Human       | -                                                           |
|          |            | <i>mirabilis</i>         |           |           |             |                                                             |
| CP054158 | chromosome | <i>Providencia</i>       | Canada    | 2009      | Food        | -                                                           |
|          |            | <i>rettgeri</i>          |           |           |             |                                                             |
| MK840873 | chromosome | <i>Enterococcus</i>      | China     | 2019      | Animal      | -                                                           |
|          |            | <i>hirae</i>             |           |           |             |                                                             |
| CP017962 | chromosome | <i>Virgibacillus</i>     | China     | 2014      | Environment |                                                             |
|          |            | <i>halodenitrificans</i> |           |           |             |                                                             |
| CP064826 | chromosome | <i>Morganella</i>        | China     | 2015      | Human       |                                                             |
|          |            | <i>morganii</i>          |           |           |             |                                                             |
| MT813046 | plasmid    | <i>Providencia</i>       | China     | 2018-2019 | Animal      | NT                                                          |
|          |            | <i>stuartii</i>          |           |           |             |                                                             |
| MG516911 | plasmid    | <i>Proteus</i>           | Australia | 2017      | Animal      | NT                                                          |
|          |            | <i>mirabilis</i>         |           |           |             |                                                             |
| MH491967 | plasmid    | <i>Proteus</i>           | China     | 2018      | -           | NT                                                          |
|          |            | <i>mirabilis</i>         |           |           |             |                                                             |
| CP042907 | chromosome | <i>Proteus</i>           | France    | 2016      | Human       | -                                                           |
|          |            | <i>mirabilis</i>         |           |           |             |                                                             |
| CP047640 | plasmid    | <i>Proteus sp.</i>       | China     | 2020      | Animal      | NT                                                          |
| MW298655 | plasmid    | <i>Escherichia coli</i>  | Canada    | 2020      | Animal      | NT                                                          |
| CP072987 | plasmid    | <i>Escherichia coli</i>  | Canada    | 2020      | Animal      | NT                                                          |
| MW298657 | plasmid    | <i>Escherichia coli</i>  | Canada    | 2020      | Animal      | NT                                                          |
| CP037911 | plasmid    | <i>Escherichia coli</i>  | China     | 2017      | Animal      | IncX4,<br>IncFIA(HI1),<br>IncHI1A,<br>IncHI1B(R27)          |
| MN101856 | plasmid    | <i>Escherichia coli</i>  | China     | 2019      | Food        | IncFIA(HI1),<br>IncHI1A,<br>IncHI1B(R27)                    |
| MN101858 | plasmid    | <i>Escherichia coli</i>  | China     | 2019      | Food        | IncFII(pHN7A8),<br>IncFIA(HI1),<br>IncHI1A,<br>IncHI1B(R27) |
| MW940615 | plasmid    | <i>Klebsiella sp.</i>    | China     | 2019      | Food        | IncFIA(HI1),<br>IncHI1A,<br>IncHI1B(R27)                    |
| MT219825 | plasmid    | <i>Escherichia coli</i>  | China     | 2020      | Environment | IncX1,                                                      |

|          |         |                              |                |      |        |                                                        |
|----------|---------|------------------------------|----------------|------|--------|--------------------------------------------------------|
|          |         |                              |                |      |        | IncFIA(HI1),<br>IncHI1A,<br>IncHI1B(R27)               |
| MW940627 | plasmid | <i>Citrobacter sp.</i>       | China          | 2019 | Food   | IncFIA(HI1),<br>IncHI1A,<br>IncHI1B(R27)               |
| LT795503 | plasmid | <i>Escherichia coli</i>      | United Kingdom | 2017 | Animal | IncFIA(HI1),<br>IncHI1A,<br>IncHI1B(R27)               |
| MK605407 | plasmid | <i>Escherichia coli</i>      | Czechia        | 2019 | Animal | NT                                                     |
| CP046004 | plasmid | <i>Escherichia coli</i>      | China          | 2019 | Animal | IncFIA(HI1),<br>IncHI1A,<br>IncHI1B(R27)               |
| CP046007 | plasmid | <i>Escherichia coli</i>      | China          | 2019 | Animal | IncFIA(HI1),<br>IncHI1A,<br>IncHI1B(R27)               |
| CP059284 | plasmid | <i>Escherichia coli</i>      | China          | 2020 | Food   | IncFIA(HI1),<br>IncHI1A,<br>IncHI1B(R27)               |
| CP058949 | plasmid | <i>Escherichia coli</i>      | China          | 2020 | Food   | IncFIA(HI1),<br>IncHI1A,<br>IncHI1B(R27)               |
| CP059044 | plasmid | <i>Escherichia coli</i>      | China          | 2020 | Food   | IncFIA(HI1),<br>IncHI1A,<br>IncHI1B(R27)               |
| CP046717 | plasmid | <i>Escherichia coli</i>      | China          | 2019 | Animal | IncFIA(HI1),<br>IncHI1A,<br>IncHI1B(R27)               |
| CP049354 | plasmid | <i>Escherichia coli</i>      | China          | 2020 | Animal | IncFIA(HI1),<br>IncHI1A,<br>IncHI1B(R27)               |
| CP041449 | plasmid | <i>Escherichia coli</i>      | China          | 2019 | Food   | IncFIA(HI1),<br>IncHI1A,<br>IncHI1B(R27)               |
| MT219824 | plasmid | <i>Escherichia coli</i>      | China          | 2020 | Animal | IncFIA(HI1),<br>IncHI1A,<br>IncHI1B(R27)               |
| MW940625 | plasmid | <i>Escherichia coli</i>      | China          | 2019 | Food   | IncFIB(K),<br>IncFIA(HI1),<br>IncHI1A,<br>IncHI1B(R27) |
| CP046026 | plasmid | <i>Escherichia coli</i>      | Canada         | 2019 | Animal | NT                                                     |
| MK140641 | plasmid | <i>Enterococcus faecalis</i> | China          | 2018 | Animal | rep32                                                  |

|          |            |                                 |                 |      |        |                |
|----------|------------|---------------------------------|-----------------|------|--------|----------------|
| MT723965 | plasmid    | <i>Enterococcus faecalis</i>    | Italy           | 2019 | Animal | NT             |
| AJ293027 | plasmid    | <i>uncultured eubacterium</i>   | Germany         | 2000 | Animal | NT             |
| MW390518 | plasmid    | <i>Escherichia coli</i>         | The Netherlands | 2020 | Animal | IncX4          |
| MW390525 | plasmid    | <i>Escherichia coli</i>         | The Netherlands | 2020 | Animal | IncX4          |
| CP060813 | plasmid    | <i>Acinetobacter variabilis</i> | China           | 2020 | Animal | NT             |
| KY613742 | plasmid    | <i>Listeria monocytogenes</i>   | Canada          | 2017 | Food   | rep25, repUS43 |
| CP049889 | chromosome | <i>Jeotgalibaca porci</i>       | Spain           | 2017 | Animal | -              |
| KX774387 | plasmid    | <i>Providencia rettgeri</i>     | Brazil          | 2016 | Human  | NT             |

NT: not typable.

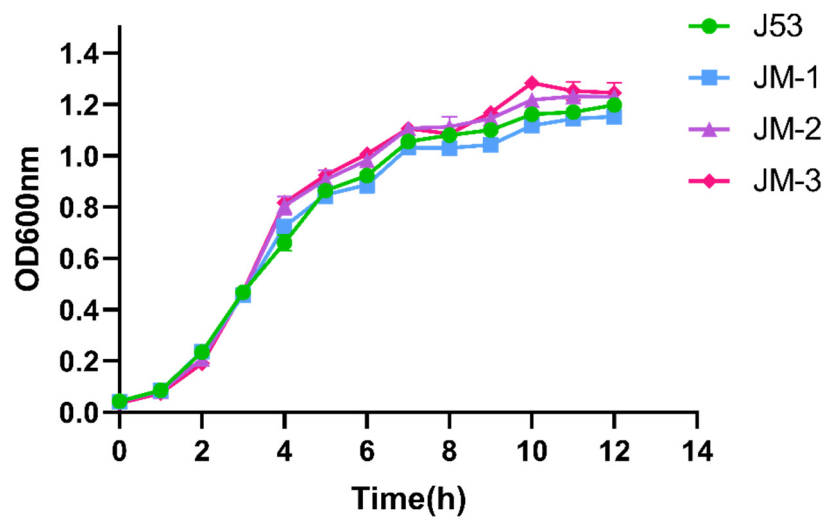

**Figure S1.** Growth curves for the transconjugants (JM-1, JM-2, and JM-3) and the recipient strain J53. Data were expressed as means  $\pm$  standard deviations and error bars show SDs.
